# Supplementary material for: Modifying a dynamic global vegetation model for simulating large spatial scale land surface water balances
Source: Copernicus journal article supplement (doi:10.5194/hess-16-2547-2012), 2012-08-07
Supplement: Supplementary file 1 [file hess-16-2547-2012-supplement.pdf]

1 **Supplementary Materials**  
2

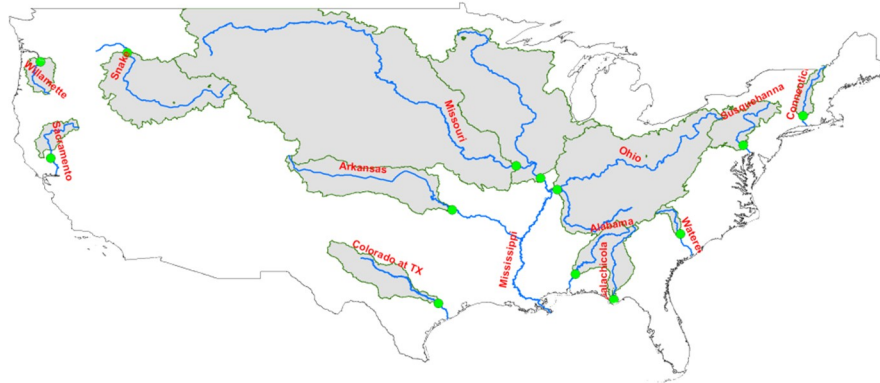

3  
4 **Fig. S1** The distribution of 13 USGS gage station (green points) and the corresponding  
5 rivers and watersheds selected in this study for model comparison. The watershed for  
6 each gage station is derived from the eight digits hydrological unit code data (Source:  
7 <ftp://gateway2.ftw.nrcs.usda.gov/Gateway/WBD/>).  
8  
9

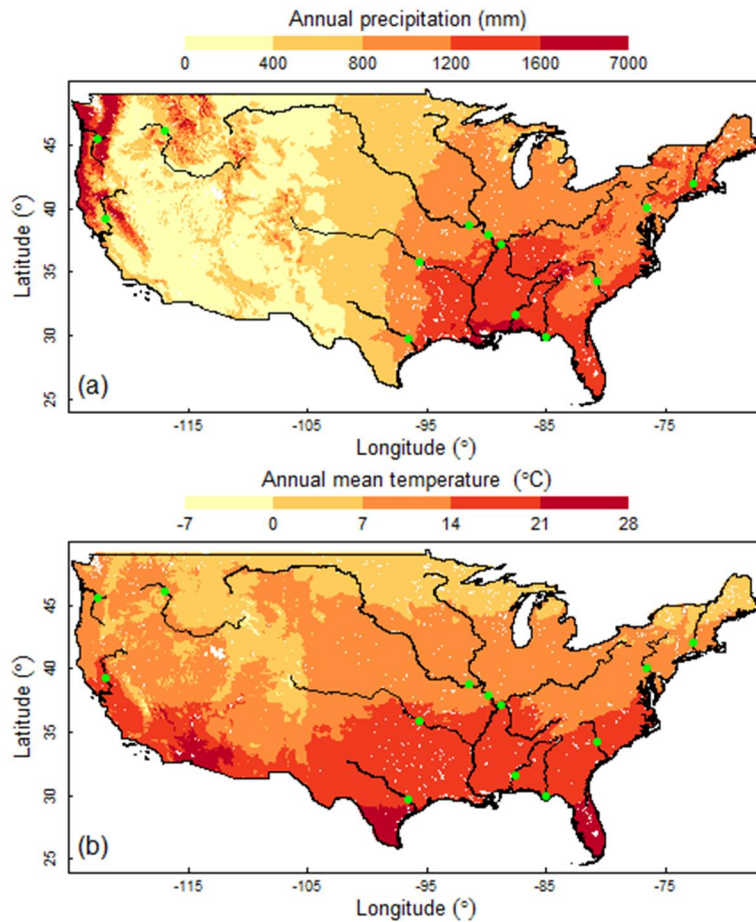

10  
11 **Fig. S2** The spatial pattern of annual total precipitation and annual mean temperature in  
12 the conterminous U.S. (Daly et al., 2000, 2002).

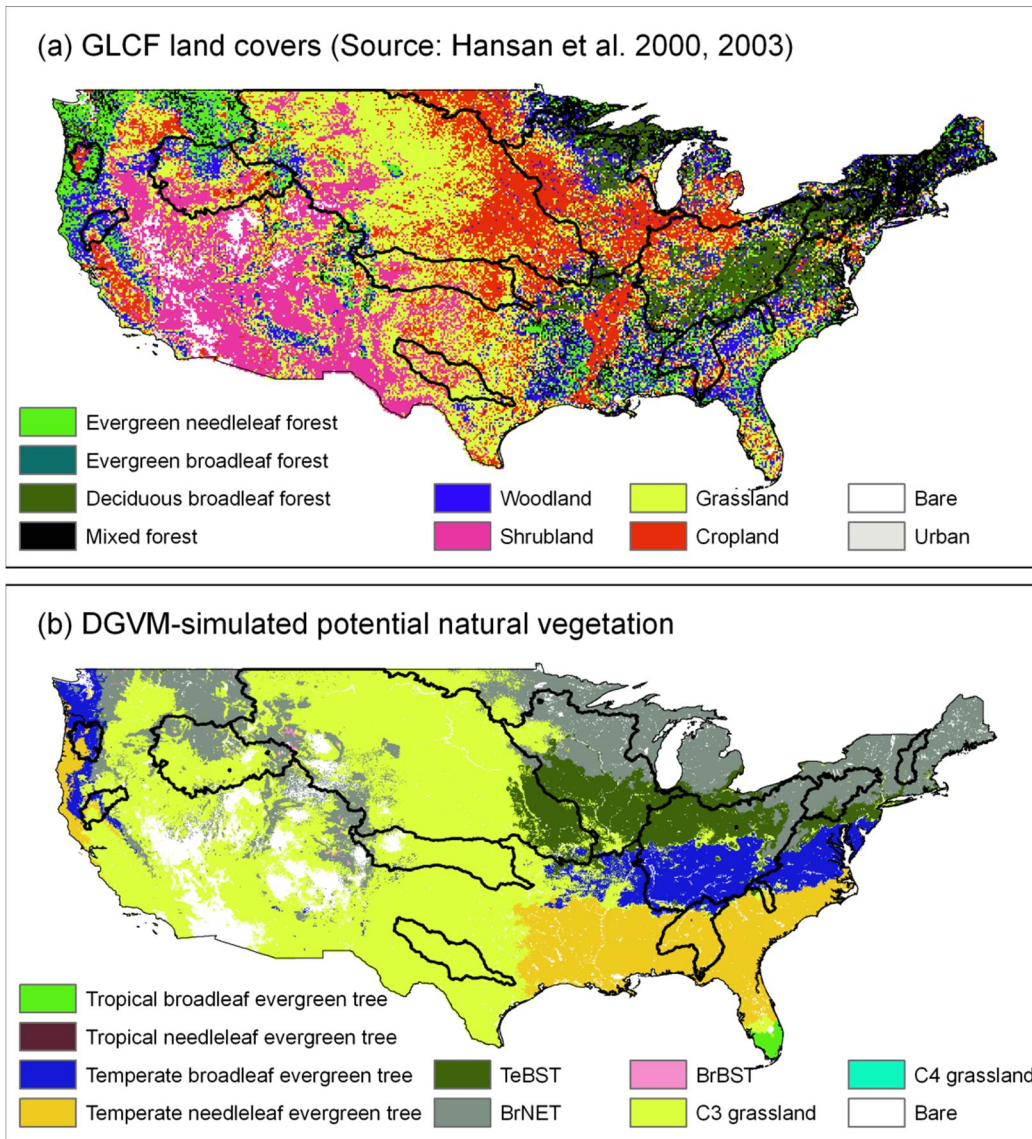

14  
15  
16  
17  
18

**Fig. S3** The predefined land covers in LH for the conterminous U.S. based on the GLCF data (Hansen et al., 2000, 2003).

This document was created with Win2PDF available at <http://www.win2pdf.com>.  
The unregistered version of Win2PDF is for evaluation or non-commercial use only.  
This page will not be added after purchasing Win2PDF.
